# Supplementary material for: Rapid and sensitive leukemia-derived exosome quantificationvianicking endonuclease-assisted target recycling
Source: Royal Society of Chemistry journal article supplement (doi:10.1039/d1ay00854d), 2021-01-01
Supplement: d1ay00854d1.pdf [file d1ay00854d1.pdf]

## Supporting Information

### Rapid and sensitive leukemia-derived exosome quantification via nicking endonuclease-assisted target recycling

Mengyang Zhou<sup>a,1</sup>, Chao Li<sup>a,1</sup>, Baolong Wang<sup>b</sup>, Lin Huang<sup>a,\*</sup>

<sup>a</sup> School of Life Sciences, Anhui Medical University, Hefei, Anhui 230032, China

<sup>b</sup> The first affiliated hospital of USTC, Anhui provincial hospital, Hefei, Anhui 230001, China

\* Corresponding author

E-mail addresses: huanglin8904@163.com (L. Huang)

<sup>1</sup>Mengyang Zhou and Chao Li are equally contributed to this work

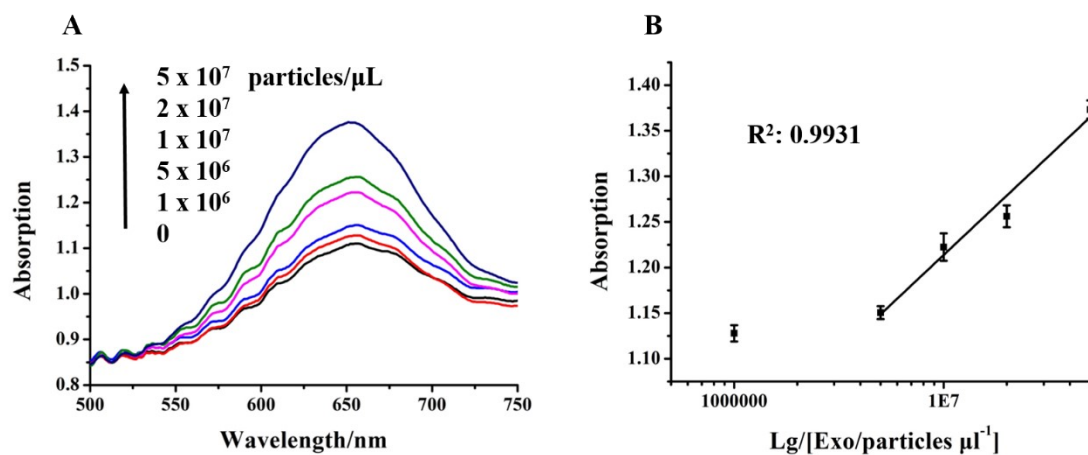

Fig. S1. The result of ELISA. (A) The absorption of ELISA with different concentrations of exosomes. (B) Standard curve of the absorption intensity versus logarithm of exosomes concentration.
